# Supplementary material for: Immune Responses to HBV Vaccine in People Living with HIV (PLWHs) Who Achieved Successful Treatment: A Prospective Cohort Study
Source: MDPI journal article supplement (doi:10.3390/vaccines11020400), 2023-02-09
Supplement: s1 [file s1]

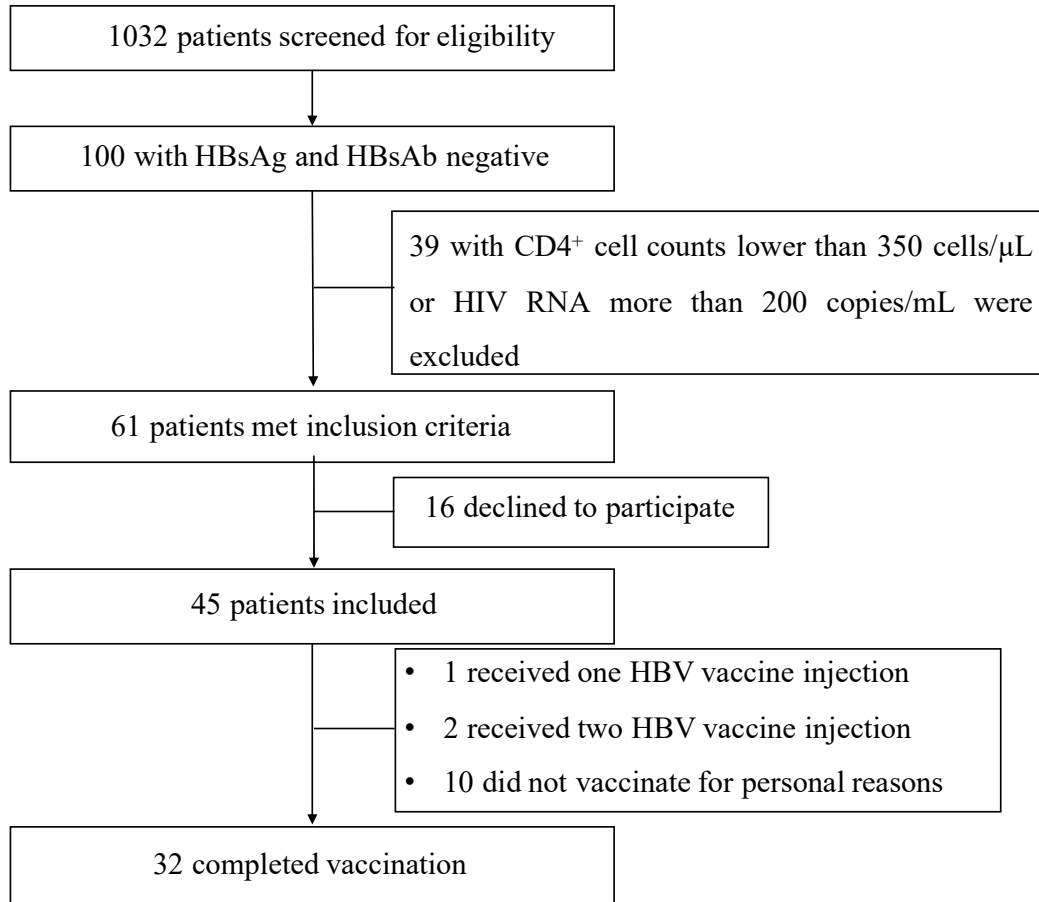

Figure S1. Flow chart for recruitment of the patients attended during the study period.

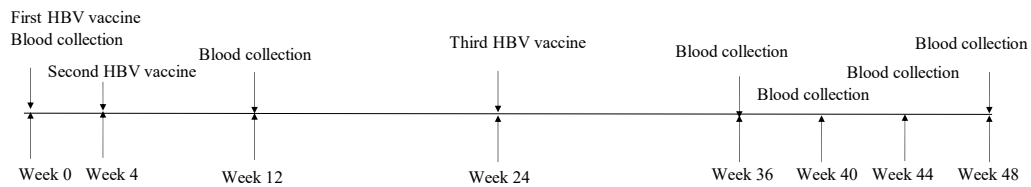

Figure S2. Timeline of vaccination and blood collection

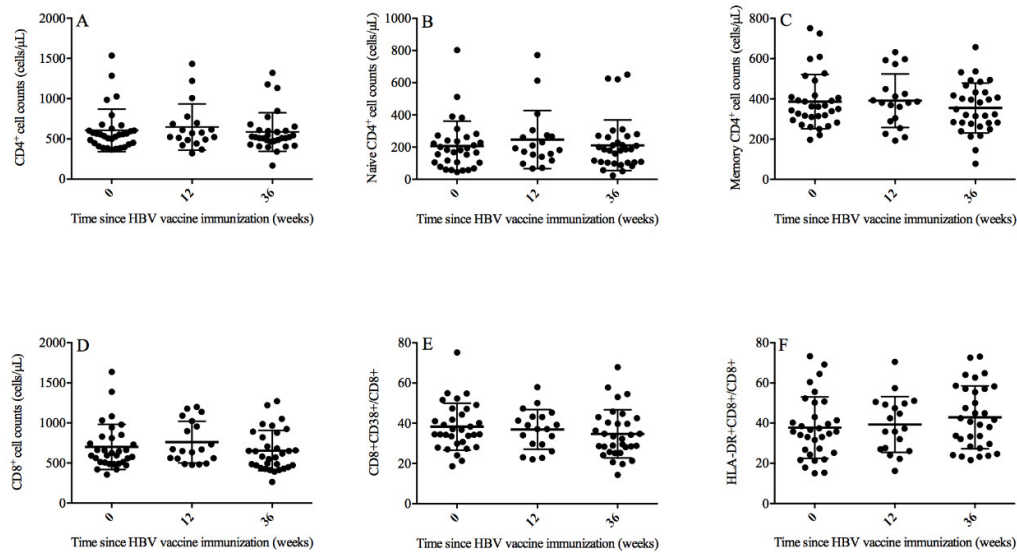

Figure S3. The changes in T cell subsets counts. The dynamics of CD4<sup>+</sup> cell count (A), naïve CD4<sup>+</sup> cell count (B), memory CD4<sup>+</sup> cell count (C), CD8<sup>+</sup> cell count (D), CD38<sup>+</sup> CD8<sup>+</sup> percentage (E), HLA-DR<sup>+</sup> CD8<sup>+</sup> percentage (F) before HBV vaccine immunization, 12 weeks and 36 weeks after receiving the first HBV vaccine.

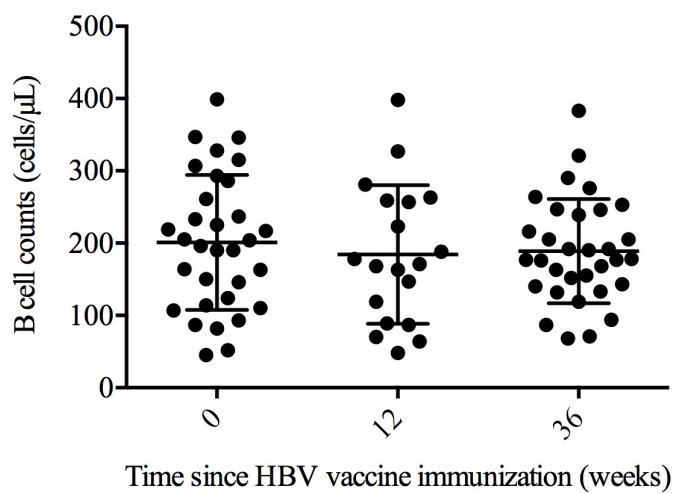

Figure S4. The changes in B cell counts during the follow-up period. There were no relevant alterations in B cell counts.
